# Supplementary material for: Living upside down: patterns of red coral settlement in a cave
Source: PubMed Central journal article supplement (PMC5967367; doi:10.7717/peerj.4649), 2018-05-21

$$\text{DeltaK} = \text{mean}(|L''(K)|) / \text{sd}(L(K))$$

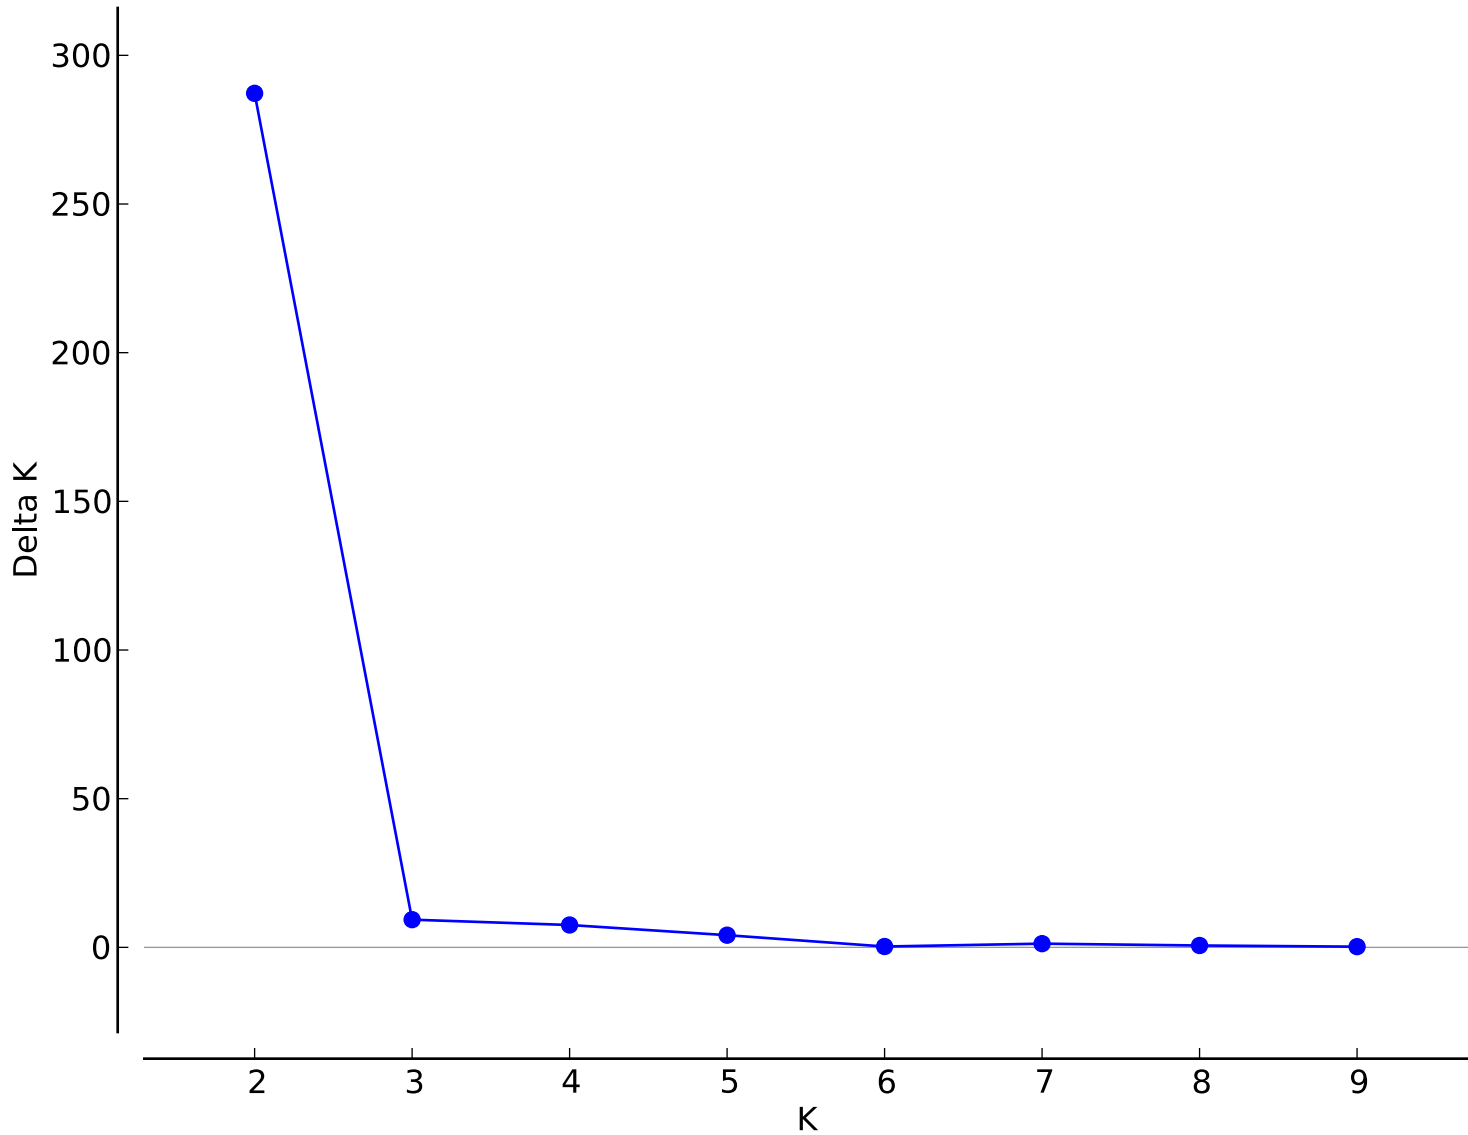

Supplement: peerj-06-4649-s001.pdf [file peerj-06-4649-s001.pdf]
