# Supplementary material for: Living upside down: patterns of red coral settlement in a cave
Source: PubMed Central journal article supplement (PMC5967367; doi:10.7717/peerj.4649), 2018-05-21

K = 1  
Mean(LnProb) = -6876.3

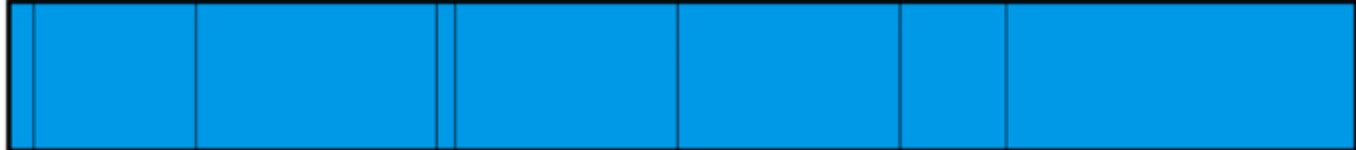

K = 2  
Mean(LnProb) = -6320.6

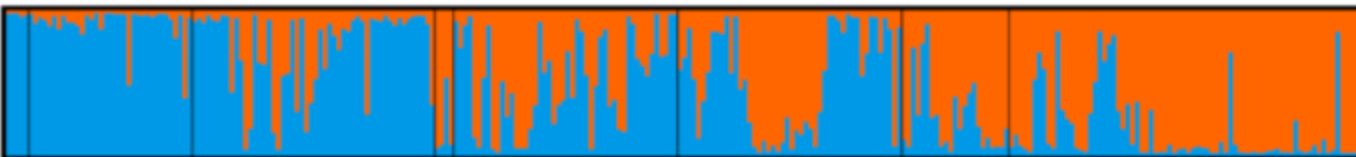

K = 3  
Mean(LnProb) = -6006.5

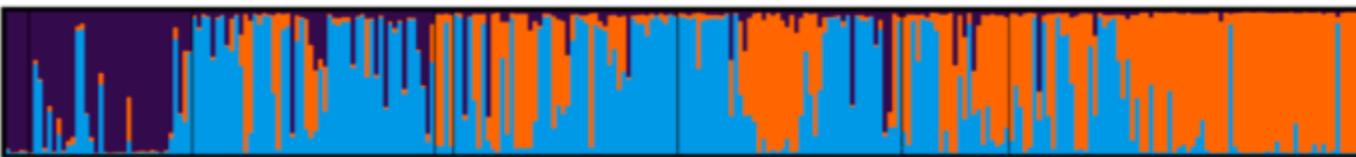

K = 4  
Mean(LnProb) = -5738.7

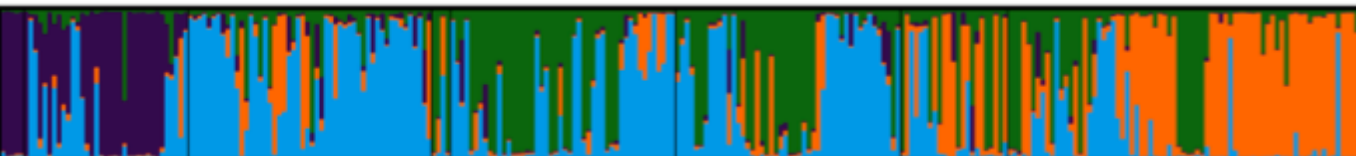

K = 5  
Mean(LnProb) = -5522.2

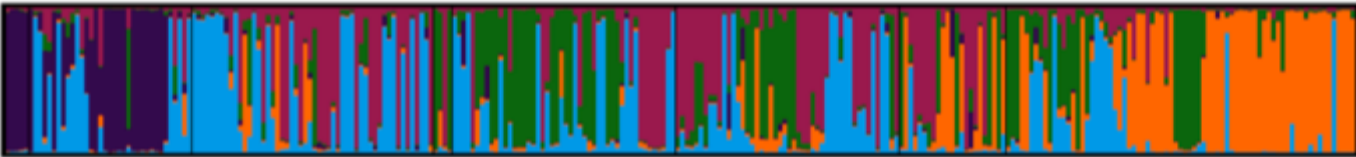

K = 6  
Mean(LnProb) = -5400.2

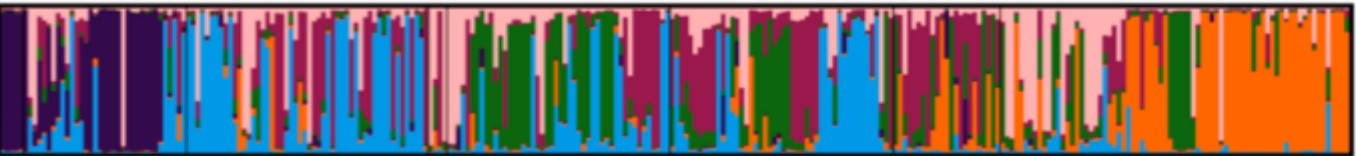

K = 7  
Mean(LnProb) = -5256.8

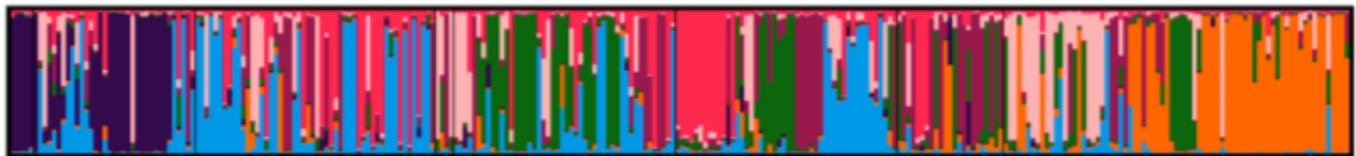

K = 8  
Mean(LnProb) = -5185.1

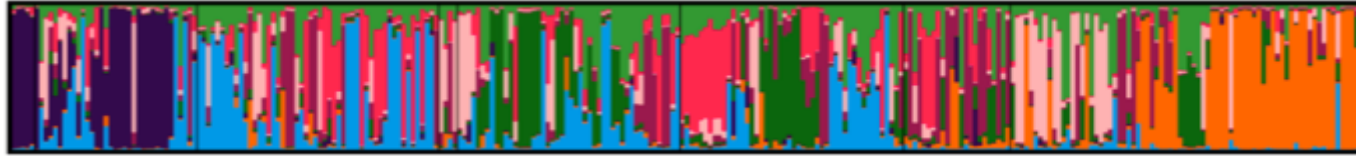

Supplement: peerj-06-4649-s002.pdf [file peerj-06-4649-s002.pdf]
