# Supplementary material for: Living upside down: patterns of red coral settlement in a cave
Source: PubMed Central journal article supplement (PMC5967367; doi:10.7717/peerj.4649), 2018-05-21

# Value of BIC versus number of clusters

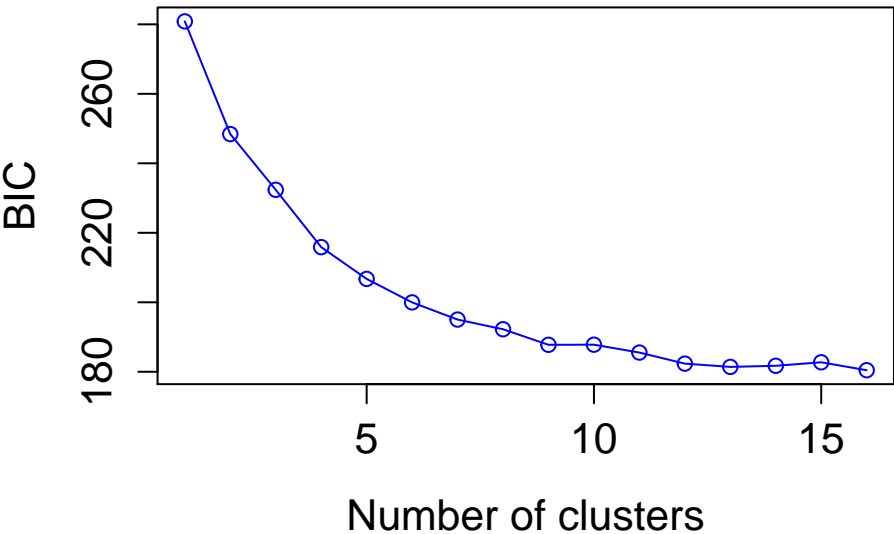

Supplement: peerj-06-4649-s003.pdf [file peerj-06-4649-s003.pdf]
