# Supplementary material for: Living upside down: patterns of red coral settlement in a cave
Source: PeerJ. 2018 May 21;6:e4649. doi: 10.7717/peerj.4649 (PMC5967367; doi:10.7717/peerj.4649)
Supplement: Supplemental Information 1 — Genotype of each individual, position of each individual on the tile, identification as juvenile or recruit, n. of polyps, diameter, height. [file peerj-06-4649-s004.xls]

## Sheet: Foglio1
Progressive N.	Tile	ID	Wall/Ceiling	alleleA	alleleB	alleleA	alleleB	alleleA	alleleB	alleleA	alleleB	alleleA	alleleB	alleleA	alleleB	alleleA	alleleB	Tile position		Juvenile/recuit	N°polyps	Height (mm)	Diameter (mm)
				cor 9		mic20		mic24		mic26		cor46		cor58		L7		x	y	J/R
1	t2	t2 1	W	0	0	0	0	0	0	0	0	0	0	0	0	0	0	16.64	17.45	R	2	0	1.6
2	t2	t2 2	W	0	0	0	0	0	0	0	0	0	0	0	0	0	0	19.08	16.52	R	1	0	1
3	t2	t2 3	W	0	0	0	0	0	0	0	0	0	0	0	0	0	0	23.03	13.81	R	1	0	1.2
4	t2	t2 4	W	0	0	0	0	0	0	0	0	0	0	0	0	0	0	16.4	5.22	R	2	0	0.5
5	t3	t3 1	C	158	158	192	192	195	195	152	152	195	195	191	195	158	160	15.9	2.9	R	6	0	2.4
6	t3	t3 2	C	0	0	0	0	0	0	0	0	0	0	0	0	0	0	19.73	5.37	J	0	1.5	2
7	t3	t3 3	C	158	158	192	192	195	195	0	0	195	195	0	0	160	192	22.16	4.86	R	2	0	1.6
8	t3	t3 4	C	158	176	198	198	195	195	160	160	195	195	0	0	158	160	24.47	7.45	R	3	0	3.2
9	t3	t3 5	C	0	0	0	0	0	0	0	0	0	0	0	0	0	0	21.92	6.93	R	0	0	1.8
10	t3	t3 6	C	158	158	200	200	195	195	176	176	195	195	177	177	158	160	26.98	2.75	R	2	0	1.8
11	t3	t3 7	C	0	0	0	0	0	0	0	0	0	0	0	0	0	0	26.98	2.75	J	0	2.1	3.3
12	t3	t3 8	C	0	0	0	0	0	0	0	0	0	0	0	0	0	0	21.1	8.35	R	0	0	1.8
13	t3	t3 9	C	0	0	0	0	0	0	0	0	0	0	0	0	0	0	14.63	8.86	R	0	0	2.5
14	t3	t3 10	C	158	158	192	192	195	195	170	170	195	195	173	177	158	198	11.1	20.16	J	2	2.4	2.1
15	t4	t4 1	C	158	176	192	192	195	195	152	152	195	195	177	177	160	160	10.97	3.06	R	6	0	6.3
16	t4	t4 2	C	158	176	200	200	149	149	162	162	195	195	177	177	208	208	16.56	2.41	R	4	0	7.26
17	t4	t4 3	C	158	158	194	194	149	169	162	162	195	195	177	177	0	0	18.85	2.93	R	2	0	3.42
18	t4	t4 4	C	158	158	198	198	147	147	162	162	195	195	195	195	192	192	21.71	2.13	R	2	0	1.57
19	t4	t4 5	C	158	176	200	200	147	147	162	164	195	195	177	177	160	204	22.95	3.06	R	3	0	3.7
20	t4	t4 6	C	174	174	200	200	185	185	152	152	199	199	167	167	160	204	21.71	3.78	J	5	4.1	1.92
21	t4	t4 7	C	178	178	200	200	147	147	162	170	195	195	177	177	160	160	20	4.78	J	11	3.7	2.32
22	t4	t4 8	C	158	176	0	0	147	181	162	170	195	195	167	195	160	160	17.24	4.18	J	5	1.8	2.19
23	t4	t4 9	C	158	158	200	204	147	147	162	162	195	195	167	195	160	160	15.44	6	J	8	3.5	2.08
24	t4	t4 10	C	176	176	198	200	147	147	0	0	195	195	177	177	158	158	14.59	6.35	J	9	5	2.32
25	t4	t4 11	C	158	176	202	202	147	147	162	170	195	195	0	0	158	158	16.04	8.16	J	4	2.6	3.18
26	t4	t4 12	C	158	158	200	204	147	147	164	170	195	195	177	177	158	158	18.7	8.6	J	10	4	1.72
27	t4	t4 13	C	158	158	186	186	149	149	162	164	195	195	177	177	160	160	19.82	8.84	J	13	1.6	3.24
28	t4	t4 14	C	160	176	186	186	195	195	178	178	195	195	175	175	194	198	22.15	9.08	J	7	3.8	1.82
29	t4	t4 15	C	158	158	198	198	195	195	168	168	195	195	173	173	160	160	23.4	7.24	R	6	0	1.87
30	t4	t4 16	C	158	176	200	200	167	167	160	160	195	195	171	171	158	158	22.83	9.61	J	7	3.3	6.87
31	t4	t4 17	C	176	176	198	198	195	195	160	160	195	195	0	0	158	160	17.65	13.75	J	14	2.9	2.2
32	t4	t4 18	C	158	176	186	186	195	195	154	154	195	195	173	173	160	204	14.71	10.97	R	3	0	3.48
33	t4	t4 19	C	158	176	200	200	195	195	160	160	195	195	195	195	160	204	10.57	12.98	R	7	0	2.95
34	t4	t4 20	C	158	176	200	200	195	195	176	176	195	195	0	0	160	204	14.31	16.2	J	7	0.9	2.17
35	t4	t4 21	C	158	158	196	196	195	195	0	0	195	195	177	177	160	204	20.9	15.28	R	1	0	1.61
36	t4	t4 22	C	158	158	200	200	0	0	146	146	195	195	175	177	156	156	16.96	19.13	J	7	1.6	2.404
37	t4	t4 23	C	158	158	200	200	195	195	160	160	195	195	0	0	160	204	12.18	19.62	J	6	1.9	2.08
38	t4	t4 24	C	160	160	192	192	195	195	180	180	195	195	177	177	160	204	9.93	18.41	R	2	0	2.4
39	t4	t4 25	C	158	158	194	194	195	195	160	160	195	195	177	177	158	204	4.18	18.09	R	6	0	2.83
40	t4	t4 26	C	158	158	186	186	195	195	180	180	195	195	177	177	158	160	12.1	17.89	R	2	0	1.48
41	t4	t4 27	C	158	158	200	200	195	195	168	168	195	195	177	177	158	160	12.7	19.7	R	2	0	1.62
42	t4	t4 28	C	158	176	200	200	195	195	160	160	195	195	165	165	160	160	14.31	17.07	R	1	0	1.05
43	t4	t4 29	C	158	176	192	192	195	195	154	154	195	195	195	195	160	160	14.82	17.46	R	1	0	0.85
44	t4	t4 30	C	158	176	186	186	195	195	162	162	171	195	0	0	160	160	14.47	17.46	R	1	0	1.14
45	t4	t4 31	C	158	176	200	202	147	147	162	162	195	195	0	0	160	160	15.88	15.01	R	1	0	1.38
46	t4	t4 32	C	158	176	200	202	147	147	162	164	195	195	165	165	158	158	22.09	18.07	R	2	0	1.26
47	t4	t4 33	C	158	176	200	200	147	169	162	166	195	195	0	0	160	160	19.86	7.14	R	2	0	1.8
48	t4	t4 34	C	158	176	200	200	167	169	162	162	0	0	177	177	160	162	13.21	9.1	R	1	0	1.57
49	t4	t4 35	C	158	176	202	202	147	167	164	164	195	195	183	183	160	160	11.93	9.84	R	1	0	1.47
50	t4	t4 36	C	158	176	202	202	147	167	164	164	0	0	0	0	0	0	12.28	16.49	R	1	0	0.83
51	t5	t5 1	C	158	158	200	202	149	149	162	162	195	195	0	0	158	158	7.52	3.09	R	1	0	1.22
52	t5	t5 2	C	176	176	200	202	149	149	162	162	195	195	0	0	158	204	9.43	3.98	R	6	0	5.78
53	t5	t5 3	C	158	176	200	202	149	149	130	162	195	195	177	177	158	206	9.35	3.94	R	2	0	1.42
54	t5	t5 4	C	158	176	200	202	149	149	166	166	195	195	0	0	158	158	8.94	3.58	R	1	0	1.22
55	t5	t5 5	C	158	176	202	204	149	149	162	168	179	197	0	0	158	158	9.51	1.1	R	1	0	0.61
56	t5	t5 6	C	158	176	200	200	149	149	162	162	195	195	0	0	158	158	10.8	2.32	J	14	3.3	0.145
57	t5	t5 7	C	158	176	200	202	149	173	164	164	195	195	0	0	158	206	13.9	4.55	R	1	0	1.02
58	t5	t5 8	C	158	176	198	200	173	173	164	192	195	195	0	0	158	158	12.9	2.36	J	8	3.7	0.19
59	t5	t5 9	C	158	176	200	202	147	167	162	162	195	195	167	167	158	158	11.9	4.55	J	9	5.4	0.21
60	t5	t5 10	C	158	176	200	202	149	173	130	162	195	195	0	0	158	158	13.9	4.55	R	1	0	1.29
61	t5	t5 11	C	158	158	200	202	147	167	162	164	195	195	195	195	158	158	17.5	2.07	R	2	0	2.83
62	t5	t5 12	C	180	180	200	202	147	147	162	162	0	0	195	195	158	158	19.3	2.48	R	1	0	2.45
63	t5	t5 13	C	160	160	200	202	147	147	162	162	179	195	175	175	158	158	17	4.8	J	9	6.7	2.67
64	t5	t5 14	C	158	158	200	200	147	147	130	130	195	195	183	183	0	0	17.8	6.1	J	20	4.3	1.28
65	t5	t5 15	C	158	176	200	202	149	173	162	162	195	195	175	177	158	158	15.5	5.16	R	1	0	1.44
66	t5	t5 16	C	158	158	200	202	147	167	0	0	195	195	0	0	158	158	13.9	5.53	R	3	0	1.87
67	t5	t5 18	C	158	160	200	202	147	147	130	130	195	195	0	0	158	158	8.66	8.46	R	4	0	1.04
68	t5	t5 19	C	158	176	200	202	147	167	162	162	0	0	0	0	158	158	8.58	0	R	1	0	1.29
69	t5	t5 20	C	162	176	202	202	147	167	162	162	195	195	179	179	158	158	7.72	2.15	R	1	0	0.91
70	t5	t5 21	C	160	160	200	202	147	173	162	162	0	0	177	177	158	158	12.1	0.53	R	3	0	1.83
71	t5	t5 22	C	158	158	200	202	147	169	130	162	0	0	177	177	194	194	13.2	9.35	R	3	0	2.32
72	t5	t5 23	C	158	158	202	202	147	147	130	130	0	0	177	177	194	194	14.1	8.5	R	1	0	1.44
73	t5	t5 24	C	158	160	0	0	143	143	162	162	0	0	177	177	158	158	16.1	0.16	J	19	5	1.26
74	t5	t5 25	C	162	162	202	202	147	147	0	0	0	0	177	177	158	158	14.2	0.65	J	11	5	1.09
75	t5	t5 26	C	158	176	200	202	147	147	0	0	179	179	177	177	208	208	18.8	0.12	J	8	3.1	1.2
76	t5	t5 27	C	158	176	200	202	147	147	162	162	195	195	179	179	158	158	20.6	8.54	R	14	0	1.91
77	t5	t5 28	C	158	158	200	202	147	147	162	186	195	195	161	161	206	226	23.2	9.63	J	8	3	1.12
78	t5	t5 29	C	158	176	200	200	147	147	162	172	0	0	175	175	158	158	22.6	7.07	R	3	0	1.24
79	t5	t5 30	C	0	0	200	200	147	147	162	162	0	0	0	0	0	0	23.5	6.06	R	3	0	2.47
80	t5	t5 31	C	158	176	198	198	147	147	162	162	0	0	0	0	160	160	22.1	3.7	R	3	0	2.24
81	t5	t5 32	C	158	176	202	202	147	147	162	162	0	0	159	159	160	196	20.6	1.63	R	6	0	1.67
82	t5	t5 33	C	160	160	202	202	147	147	162	162	195	209	177	195	156	156	24.2	2.15	R	12	0	5.72
83	t5	t5 34	C	180	180	200	202	147	221	164	166	195	195	169	173	198	204	25.7	2.76	R	5	0	3.02
84	t5	t5 35	C	162	162	202	202	147	173	170	176	195	195	175	177	192	192	26.4	2.48	J	5	2.9	1.2
85	t5	t5 36	C	156	156	200	202	147	167	164	164	195	195	191	191	158	158	26.4	2.57	J	1	1.9	1.22
86	t5	t5 37	C	158	158	200	202	147	167	162	162	195	195	171	171	158	210	26.4	4.15	R	1	0	1.83
87	t5	t5 38	C	158	158	200	202	167	187	162	164	171	171	199	199	158	158	27.4	4.88	R	1	0	1.63
88	t5	t5 39	C	158	176	200	202	147	173	162	162	195	195	0	0	158	158	25.1	4.55	R	4	0	5.05
89	t5	t5 40	C	158	158	200	202	147	173	162	162	195	195	0	0	158	158	25.5	6.1	R	1	0	3.66
90	t5	t5 41	C	158	176	200	200	147	147	170	170	195	195	0	0	158	158	25.7	7.67	R	1	0	1.42
91	t5	t5 42	C	160	160	200	202	147	173	164	164	195	195	161	161	198	200	27.7	5.77	R	2	0	2.16
92	t5	t5 43	C	160	160	200	202	147	173	164	164	195	195	0	0	158	158	24	11.22	R	1	0	1.92
93	t5	t5 44	C	158	158	202	202	147	147	162	162	195	195	177	177	158	158	20.2	12.6	J	13	3.9	8.36
94	t5	t5 45	C	158	158	200	202	147	147	164	164	195	195	167	167	176	176	26.4	12.93	J	12	2.3	2.01
95	t5	t5 46	C	158	176	200	202	147	147	174	176	195	195	167	167	192	210	25.7	12.98	J	9	3.1	1.77
96	t5	t5 47	C	160	160	202	202	173	173	162	164	195	195	171	171	158	192	25.4	14.23	J	7	5.7	1.79
97	t5	t5 48	C	158	176	202	204	147	187	162	172	195	195	0	0	0	0	23.5	16.91	J	9	4.4	1.87
98	t5	t5 49	C	158	176	202	204	147	173	162	168	195	195	0	0	192	208	22.4	17.42	J	14	4.3	1.31
99	t5	t5 50	C	158	176	200	202	147	167	162	168	195	195	0	0	0	0	18.2	17.26	J	7	5.9	2.39
100	t5	t5 51	C	158	176	200	202	147	147	188	194	195	195	0	0	158	158	17.1	18.5	R	1	0	1.6
101	t5	t5 52	C	158	176	200	202	147	167	162	164	195	195	0	0	158	208	15.2	19.51	R	2	0	2
102	t5	t5 53	C	158	176	200	200	147	147	164	164	195	195	167	177	192	200	14.1	18.23	R	2	0	1.22
103	t5	t5 54	C	158	176	200	202	147	147	172	170	195	195	167	167	208	208	14.7	20.79	R	1	0	0.57
104	t5	t5 55	C	158	176	200	202	147	175	164	164	195	195	185	185	194	196	14.3	20.49	R	3	0	5.03
105	t5	t5 56	C	158	176	200	202	147	169	166	166	195	195	0	0	158	158	13	17.53	R	2	0	1.63
106	t5	t5 57	C	158	176	200	202	147	173	166	166	195	195	195	195	194	198	11.8	16.69	R	1	0	2.45
107	t5	t5 58	C	158	176	200	202	147	147	170	170	195	195	0	0	196	208	11.5	15.47	R	3	0	2.16
108	t5	t5 59	C	158	176	200	204	147	173	162	162	195	195	163	163	160	160	12.2	14.28	R	2	0	3.21
109	t5	t5 60	C	0	0	202	204	147	147	162	170	195	195	0	0	0	0	12.2	13.31	R	2	0	2.04
110	t5	t5 61	C	0	0	200	202	147	187	174	174	0	0	0	0	0	0	10.2	19.11	R	1	0	3.32
111	t5	t5 62	C	158	176	200	202	147	187	174	174	0	0	167	167	158	158	9.63	20.68	R	2	0	1.88
112	t5	t5 63	C	0	0	200	202	147	147	162	162	0	0	0	0	0	0	8.55	18.83	R	2	0	1.5
113	t5	t5 64	C	0	0	200	202	147	167	160	162	0	0	0	0	0	0	8.06	19.57	R	1	0	2.5
114	t5	t5 65	C	0	0	200	202	147	187	162	162	0	0	0	0	0	0	26.2	19.65	R	1	0	2.03
115	t5	t5 66	C	0	0	200	202	147	147	162	162	0	0	0	0	0	0	26.2	20.14	R	1	0	1.23
116	t5	t5 67	C	0	0	200	202	147	147	162	162	0	0	0	0	0	0	27.1	19.96	R	2	0	1.35
117	t5	t5 68	C	0	0	200	202	173	173	162	162	0	0	0	0	0	0	24.5	28.28	R	1	0	1.55
118	t5	t5 69	C	0	0	200	202	147	169	162	162	0	0	0	0	0	0	24.4	19.08	R	1	0	0.84
119	t5	t5 70	C	0	0	200	202	147	173	166	166	181	181	0	0	0	0	27.7	17.11	R	1	0	1.08
120	t5	t5 71	C	0	0	196	202	147	147	162	162	0	0	0	0	0	0	26.7	13.9	R	1	0	1.36
121	t5	t5 72	C	0	0	202	204	147	147	164	164	0	0	0	0	0	0	25.5	13.9	R	2	0	0.68
122	t5	t5 73	C	0	0	200	202	147	147	166	166	0	0	0	0	0	0	7.8	12.57	R	1	0	1.75
123	t5	t5 74	C	0	0	200	202	147	147	162	162	0	0	0	0	0	0	7.29	12.47	R	1	0	0.81
124	t5	t5 75	C	0	0	202	202	147	147	164	164	0	0	0	0	0	0	25.4	3.28	R	1	0	0.95
125	t5	t5 76	C	0	0	200	202	147	147	162	162	0	0	0	0	0	0	8.46	16.29	R	1	0	1.04
126	t5	t5 77	C	0	0	200	202	147	167	172	172	0	0	0	0	0	0	22.3	14.11	R	1	0	1.84
127	t6	t6 1	C	0	0	200	200	0	0	162	162	199	199	177	177	158	158	11.78	4.99	R	1	0	1.87
128	t6	t6 2	C	160	160	200	200	0	0	162	162	197	197	177	177	158	158	14.36	3.72	J	10	5.6	1.83
129	t6	t6 3	C	166	176	200	202	147	167	162	162	189	189	177	177	158	158	15.26	5.19	R	1	0	1.84
130	t6	t6 4	C	0	0	200	200	0	0	162	162	195	195	177	177	158	158	15.21	7.85	R	1	0	1.42
131	t6	t6 5	C	0	0	200	202	0	0	162	162	0	0	0	0	158	158	14.76	8.88	R	2	0	2.47
132	t6	t6 6	C	0	0	200	202	0	0	162	162	191	193	0	0	0	0	13.5	8.83	R	1	0	1.19
133	t6	t6 7	C	176	176	202	204	147	169	164	170	0	0	197	197	158	158	9.16	8.3	R	1	0	1.87
134	t6	t6 8	C	0	0	200	202	0	0	162	162	195	195	177	177	158	158	8.1	12.92	R	2	0	2.82
135	t6	t6 9	C	160	160	200	202	0	0	162	162	195	195	177	177	158	158	24.05	17.6	R	2	0	1.24
136	t6	t6 10	C	0	0	200	202	0	0	162	162	195	195	177	177	158	158	25.09	18.22	R	1	0	0.82
137	t6	t6 11	C	0	0	200	202	147	169	128	128	0	0	177	177	0	0	25.71	20.45	R	1	0	1.02
138	t7	t7 1	C	168	168	202	202	147	147	162	162	173	173	183	183	0	0	11.36	3.18	R	1	0	1.92
139	t7	t7 2	C	166	176	202	202	147	147	162	162	193	197	183	183	0	0	11.51	4.44	R	1	0	0.77
140	t7	t7 3	C	174	174	196	200	147	147	162	162	195	195	177	177	0	0	13.71	4.82	R	2	0	3.08
141	t7	t7 4	C	178	178	200	200	147	147	164	164	195	195	0	0	0	0	15.93	3.49	J	13	1.6	1.75
142	t7	t7 5	C	162	162	200	200	165	173	164	164	195	195	0	0	0	0	16.01	5.43	J	13	4.2	3.4
143	t7	t7 6	C	162	162	200	200	147	177	164	164	177	177	177	177	158	158	14.96	6.13	R	4	0	2.82
144	t7	t7 7	C	184	184	200	202	147	147	162	162	195	195	177	177	158	158	13.76	5.87	R	2	0	1.34
145	t7	t7 8	C	0	0	200	200	171	173	162	162	193	193	0	0	158	158	10.51	6.36	R	2	0	2.17
146	t7	t7 9	C	140	140	202	202	147	167	168	168	195	195	0	0	158	160	12.15	7.58	R	4	0	2.59
147	t7	t7 10	C	154	154	200	200	147	167	162	162	195	195	177	177	158	158	11.46	7.76	R	2	0	1.46
148	t7	t7 11	C	154	154	200	202	147	147	162	162	185	185	177	177	158	158	12.46	9.09	R	3	0	1.54
149	t7	t7 12	C	176	176	200	202	147	147	162	162	195	195	177	177	158	158	11.13	10.22	R	1	0	0.96
150	t7	t7 13	C	154	154	200	202	0	0	162	162	195	195	0	0	158	158	14.37	9.88	R	6	0	4.62
151	t7	t7 14	C	166	166	202	204	147	173	164	164	195	195	177	177	158	158	14.53	6.87	R	2	0	0.96
152	t7	t7 15	C	154	154	200	202	147	147	162	162	195	195	177	177	158	158	15.83	7.74	R	2	0	1.74
153	t7	t7 16	C	164	164	200	202	147	147	162	162	195	195	177	177	158	158	15.63	8.48	R	1	0	1.36
154	t7	t7 17	C	164	164	200	202	147	147	162	162	195	195	177	177	158	158	15.4	8.53	R	2	0	1.12
155	t7	t7 18	C	154	154	200	202	147	147	162	162	195	195	163	163	158	158	17.16	9.83	R	3	0	2.07
156	t7	t7 19	C	154	154	200	202	147	147	162	162	195	195	0	0	158	158	17.83	10.17	R	1	0	1.17
157	t7	t7 20	C	158	158	200	202	147	147	162	162	195	195	0	0	164	164	17.44	6.53	R	2	0	1.17
158	t7	t7 21	C	0	0	200	202	147	147	162	162	195	195	0	0	0	0	22.94	2.38	J	18	4.4	4.38
159	t7	t7 22	C	160	160	200	202	147	147	162	162	195	195	197	197	194	194	22.98	3.76	R	4	0	3.22
160	t7	t7 23	C	160	160	200	202	147	147	162	162	195	195	197	197	0	0	24.71	4.83	R	22	0	2.52
161	t7	t7 24	C	154	154	200	202	147	147	162	162	177	177	0	0	158	206	24.4	8.67	J	8	9.1	1.55
162	t7	t7 25	C	164	164	200	202	147	147	162	162	195	195	0	0	158	158	24.4	9.9	J	22	4	1.92
163	t7	t7 26	C	146	146	200	202	147	147	162	162	195	195	0	0	158	158	23.59	9.55	R	13	0	2.93
164	t7	t7 27	C	140	140	200	202	147	147	162	162	195	195	0	0	158	158	23.09	11.66	J	13	6.1	8.95
165	t7	t7 28	C	166	166	200	202	147	147	162	162	195	195	0	0	158	158	25.09	10.78	R	5	0	2.87
166	t7	t7 29	C	0	0	202	202	147	147	164	164	195	195	0	0	158	158	25.24	12.16	R	2	0	6.49
167	t7	t7 30	C	148	148	202	202	147	147	164	164	195	195	0	0	158	158	25.63	13.16	R	3	0	3.69
168	t7	t7 31	C	176	176	200	202	147	147	162	162	195	195	191	191	158	158	25.17	12.16	R	2	0	2.43
169	t7	t7 32	C	0	0	200	202	147	187	188	188	195	195	0	0	158	158	22.75	13	J	18	5.7	3.72
170	t7	t7 33	C	0	0	200	202	147	147	162	162	195	195	159	159	158	158	12.54	12.85	R	3	0	1.79
171	t7	t7 34	C	0	0	200	202	147	171	162	162	195	195	191	191	158	158	10.13	13.24	R	3	0	0.81
172	t7	t7 35	C	158	158	200	202	147	147	162	162	195	195	0	0	158	158	14.85	14.19	J	14	5.7	1.99
173	t7	t7 36	C	158	158	200	204	147	147	162	162	195	195	0	0	158	158	14.31	15.5	R	2	0	1.55
174	t7	t7 37	C	0	0	202	202	147	147	162	162	195	195	0	0	158	158	13.43	14.85	R	2	0	5.02
175	t7	t7 38	C	0	0	200	202	147	173	162	162	195	195	0	0	158	158	9.71	16.53	R	2	0	0.86
176	t7	t7 39	C	0	0	200	202	147	173	162	162	195	195	165	165	158	158	17.53	15	J	12	4.4	5.78
177	t7	t7 40	C	158	158	200	200	147	167	162	162	195	195	179	179	158	158	17.84	14.39	R	1	0	0.96
178	t7	t7 41	C	176	176	202	202	147	171	0	0	195	195	0	0	158	158	18.3	15.61	R	2	0	1.03
179	t7	t7 42	C	176	176	200	202	147	169	164	164	195	195	177	177	158	158	20.49	14.92	R	2	0	1.34
180	t7	t7 43	C	158	158	202	202	149	173	162	162	195	195	177	177	158	158	20.41	14.88	R	1	0	0.38
181	t7	t7 44	C	0	0	202	202	149	149	162	162	0	0	0	0	0	0	20.49	14.92	R	1	0	0.9
182	t7	t7 45	C	0	0	200	202	149	169	162	162	0	0	0	0	0	0	20.41	14.96	R	11	0	5.65
183	t7	t7 46	C	0	0	200	202	149	173	164	164	0	0	0	0	0	0	21.29	15.84	J	19	1.1	2.07
184	t7	t7 47	C	0	0	200	202	149	171	164	164	0	0	0	0	0	0	20.33	16.73	J	12	5.7	1.97
185	t7	t7 48	C	0	0	200	202	149	187	188	188	0	0	0	0	0	0	13.54	17.46	R	3	0	3.44
186	t7	t7 49	C	158	176	200	200	149	173	166	166	0	0	167	167	158	158	8.82	19.26	R	3	0	1.41
187	t7	t7 50	C	158	176	200	202	149	173	164	164	0	0	177	195	158	158	14.88	18.86	R	3	0	2.3
188	t7	t7 51	C	158	176	200	202	149	173	164	164	0	0	191	191	158	158	16.11	18.26	R	1	0	1.02
189	t7	t7 52	C	158	176	200	202	149	171	164	164	207	207	191	191	206	210	20.1	18.68	R	1	0	1.54
190	t7	t7 53	C	158	176	200	202	149	179	164	164	0	0	199	199	158	158	18.61	11.82	R	2	0	2.3
191	t7	t7 54	C	158	176	200	202	149	179	164	164	0	0	0	0	190	206	10.74	13.71	R	2	0	1.79
192	t7	t7 55	C	158	176	202	202	149	179	166	166	0	0	177	177	192	206	11.69	13.71	R	3	0	1.28
193	t7	t7 56	C	136	168	202	202	149	173	164	164	195	195	171	171	190	206	24.3	11.75	R	1	0	1.49
194	t7	t7 57	C	176	176	202	204	149	149	162	166	195	195	0	0	190	206	23.57	12.61	R	2	0	0.77
195	t8	t8 1	C	0	0	200	200	149	149	164	164	181	181	177	177	158	194	9.67	3.99	J	9	3.8	3.21
196	t8	t8 2	C	0	0	202	202	147	173	166	166	195	195	171	171	158	206	7.75	4.99	R	2	0	1.38
197	t8	t8 3	C	156	156	200	200	147	147	166	166	195	195	177	177	158	158	8.86	6.14	R	2	0	1.58
198	t8	t8 4	C	0	0	200	200	147	173	164	164	195	195	167	167	158	196	7.29	6.52	R	2	0	1.77
199	t8	t8 5	C	166	166	200	202	147	147	164	164	167	167	167	167	158	158	8.55	7.67	R	2	0	0.96
200	t8	t8 6	C	166	166	200	204	147	147	164	164	195	195	177	177	158	158	12.1	6.91	J	15	3.8	2.1
201	t8	t8 7	C	166	166	200	200	147	147	164	164	195	195	175	177	198	194	15.8	5.14	R	1	0	1.81
202	t8	t8 8	C	158	158	200	200	147	147	164	164	195	195	177	177	158	206	15	2.07	R	2	0	1.93
203	t8	t8 9	C	158	158	200	200	147	147	164	164	195	195	177	177	158	206	17.4	0.88	J	2	4.9	1.49
204	t8	t8 10	C	158	158	200	200	147	147	164	164	195	195	175	177	158	196	24.4	2.49	R	4	0	2.85
205	t8	t8 11	C	168	168	200	202	147	147	164	164	195	195	0	0	158	196	21.1	2.23	R	2	0	1.12
206	t8	t8 12	C	162	172	200	202	147	169	160	160	0	0	0	0	158	206	24.5	2.46	R	2	0	1.38
207	t8	t8 13	C	168	168	200	202	147	147	164	164	183	183	0	0	158	206	20.4	5.75	R	2	0	1.58
208	t8	t8 14	C	182	182	200	202	147	147	162	162	195	195	0	0	158	158	19.1	6.44	R	1	0	1.21
209	t8	t8 15	C	158	160	186	188	147	147	162	162	0	0	0	0	158	206	18	6.21	R	2	0	1.29
210	t8	t8 16	C	172	172	200	202	147	147	162	162	195	195	177	177	158	206	18.3	6.87	R	1	0	1.4
211	t8	t8 17	C	166	166	200	202	147	167	162	162	195	195	177	177	158	206	20.9	8.71	R	1	0	1.65
212	t8	t8 18	C	164	164	200	202	147	147	162	162	0	0	177	177	158	158	17.4	10.13	R	1	0	1.53
213	t8	t8 19	C	0	0	200	204	147	187	162	162	185	185	173	179	158	158	18.8	10.89	R	2	0	2.17
214	t8	t8 20	C	154	154	200	202	147	147	162	162	185	185	177	177	158	204	19.1	10.47	R	3	0	1.34
215	t8	t8 21	C	154	154	200	200	147	173	162	162	0	0	177	177	158	192	21.1	11.85	R	2	0	1.18
216	t8	t8 22	C	0	0	202	202	147	147	162	162	185	185	177	177	158	204	20.1	10.97	R	1	0	1.09
217	t8	t8 23	C	158	158	200	200	147	147	162	162	185	185	177	177	158	204	19.2	12.05	R	1	0	0.46
218	t8	t8 24	C	176	176	200	200	147	173	162	162	185	185	177	177	158	204	19.3	12.08	R	1	0	0.92
219	t8	t8 25	C	164	164	200	202	147	147	162	162	167	167	195	195	158	204	19.1	12.12	R	1	0	1.03
220	t8	t8 26	C	140	140	200	200	147	147	162	162	185	185	177	195	158	204	16.3	11.85	R	3	0	2.31
221	t8	t8 27	C	162	162	200	204	147	175	162	162	177	177	177	177	158	204	16.7	12.28	R	3	0	1.92
222	t8	t8 28	C	164	164	200	202	147	187	162	162	173	173	197	197	162	162	16.5	2.54	R	4	0	1.92
223	t8	t8 29	C	164	164	200	202	147	167	164	164	177	187	177	195	162	162	17.7	13.73	R	2	0	1.28
224	t8	t8 30	C	164	164	202	202	147	173	170	170	177	177	177	177	158	158	19.4	13.73	R	3	0	1.28
225	t8	t8 31	C	158	158	200	200	173	187	162	162	0	0	177	177	192	192	13.4	13.43	R	1	0	1.16
226	t8	t8 32	C	176	176	200	200	149	169	162	162	0	0	167	167	192	206	16.3	15.27	R	3	0	2.06
227	t8	t8 33	C	176	176	204	204	149	149	166	166	195	195	167	167	158	158	18	15.84	R	1	0	0.77
228	t8	t8 34	C	158	176	202	202	149	173	170	170	195	195	183	183	158	206	20.1	6.3	R	2	0	1.81
229	t8	t8 35	C	158	158	200	200	169	173	162	162	195	195	183	183	158	182	13.9	11.66	R	1	0	0.97
230	t8	t8 36	C	176	176	200	202	149	169	184	184	195	195	177	177	158	158	12.4	16.04	R	2	0	1.02
231	t8	t8 37	C	176	176	200	202	149	173	164	164	195	195	0	0	190	190	8.06	14.31	R	1	0	1.28
232	t8	t8 38	C	176	176	202	204	149	149	162	170	195	195	177	177	160	160	6.52	15.19	R	3	0	1.15
233	t8	t8 39	C	158	176	200	202	149	149	162	186	195	195	187	191	158	158	6.91	12.08	R	2	0	1.36
234	t8	t8 40	C	158	176	200	202	149	173	162	162	195	195	179	179	162	162	6.48	15.31	R	1	0	0.38
235	t8	t8 41	C	158	176	200	202	149	173	170	190	195	195	179	179	158	162	15.3	17.49	R	1	0	4.92
236	t8	t8 42	C	176	176	200	204	149	173	166	166	195	195	187	187	158	162	16	17.26	R	1	0	3
237	t8	t8 43	C	158	168	202	204	149	149	162	162	195	195	171	171	156	160	17.1	17.46	R	3	0	0.98
238	t8	t8 44	C	160	160	200	204	147	147	166	166	195	195	181	181	162	162	16.7	18.68	R	4	0	5.75
239	t8	t8 45	C	158	176	202	204	147	147	162	162	195	195	0	0	160	160	15.7	19.22	R	1	0	1.23
240	t8	t8 46	C	158	176	200	202	147	147	0	0	195	195	177	177	158	158	20.4	18.53	R	3	0	1.73
241	t8	t8 47	C	0	0	200	202	147	147	162	162	195	195	167	167	158	158	19.8	19.37	R	1	0	1.09
242	t8	t8 48	C	176	176	202	202	147	147	164	166	173	173	177	177	158	204	17.1	17.92	R	2	0	2
243	t9	t9 1	C	0	0	202	204	147	147	162	162	195	195	175	195	158	158	22.37	7.9	R	2	0	3.9
244	t9	t9 2	C	158	158	202	202	147	147	162	162	0	0	177	177	158	158	23.71	6.02	R	1	0	1.49
245	t9	t9 3	C	158	158	202	202	147	171	162	162	195	195	167	177	158	206	10.09	10.05	J	6	4.1	2.35
246	t9	t9 4	C	158	158	202	202	147	147	164	164	0	0	175	177	158	204	11.43	10.86	R	5	0	3.11
247	t9	t9 5	C	158	158	200	200	147	147	164	164	195	195	175	177	158	206	11.74	10.74	R	1	0	1.09
248	t9	t9 6	C	158	158	200	202	171	171	164	164	195	195	175	177	158	204	12.62	11.05	R	3	0	1.17
249	t9	t9 7	C	0	0	202	202	147	147	164	164	195	195	175	197	158	206	10.43	11.59	R	1	0	2
250	t9	t9 8	C	158	158	200	202	147	173	164	164	0	0	175	197	158	158	9.32	11.62	J	8	1.1	3.15
251	t9	t9 9	C	0	0	200	202	147	147	162	162	189	189	177	195	158	208	8.75	10.86	R	2	0	2.42
252	t9	t9 10	C	158	158	200	202	147	173	162	162	0	0	177	177	158	206	8.94	12.77	R	2	0	1.46
253	t9	t9 11	C	146	146	200	200	143	143	162	162	0	0	177	177	158	206	10.09	12.54	R	1	0	0.77
254	t9	t9 12	C	146	146	202	202	147	167	160	160	0	0	177	177	160	160	13.58	13.2	R	1	0	0.86
255	t9	t9 13	C	0	0	200	202	147	147	184	184	195	195	177	177	158	158	13.85	14.88	R	1	0	0.38
256	t9	t9 14	C	158	158	202	202	173	173	162	162	0	0	167	177	158	160	19.83	13.89	R	1	0	1.15
257	t9	t9 15	C	158	158	202	204	147	167	164	164	0	0	169	197	162	162	23.21	15.77	J	5	1.4	3.4
258	t9	t9 16	C	0	0	200	202	147	147	160	160	195	195	173	177	162	162	16.92	16.5	J	7	2.5	3.21
259	t9	t9 17	C	158	158	200	202	147	147	162	162	0	0	173	177	162	162	16.04	16.07	R	1	0	1.4
260	t9	t9 18	C	158	158	200	202	167	177	162	162	0	0	177	177	158	158	15.46	17.42	R	4	0	1.34
261	t9	t9 19	C	162	162	202	202	147	167	162	162	195	195	177	177	162	162	7.98	15.38	R	2	0	1.41
262	t9	t9 20	C	0	0	200	200	147	147	162	162	195	195	167	177	158	158	14.73	17.69	R	1	0	1.02
263	t9	t9 21	C	158	158	200	200	147	147	162	162	0	0	177	177	158	158	15.38	17.8	R	1	0	3.02
264	t9	t9 22	C	0	0	200	200	147	147	162	162	195	195	175	177	154	154	20.91	18.8	J	5	0.9	4.48
265	t9	t9 23	C	176	176	200	200	147	147	162	162	0	0	175	177	158	206	23.21	11.62	R	1	0	1.19
266	t10	t10 1	C	0	0	200	202	147	147	162	162	195	195	175	177	158	206	13.85	3.64	J	11	4	2.4
267	t10	t10 2	C	166	166	200	200	145	145	162	162	195	195	175	177	158	190	16.34	2.42	R	4	0	2.11
268	t10	t10 3	C	166	166	200	200	145	145	162	162	197	199	175	177	158	158	14.88	4.68	J	6	0.9	2.4
269	t10	t10 4	C	0	0	200	200	147	147	162	162	0	0	175	177	158	208	18.61	3.22	J	8	2.9	3.34
270	t10	t10 5	C	166	166	202	202	151	151	162	162	0	0	175	177	158	206	11.16	5.26	R	2	0	1.92
271	t10	t10 6	C	166	166	204	204	153	153	162	162	195	195	167	183	158	158	9.82	6.52	R	3	0	1.93
272	t10	t10 7	C	158	158	200	202	151	151	0	0	193	193	177	177	158	158	11.59	6.98	R	3	0	0.96
273	t10	t10 8	C	158	158	200	202	153	153	162	162	195	195	177	177	158	206	13.66	6.18	R	5	0	1.09
274	t10	t10 9	C	0	0	200	202	147	147	162	164	0	0	165	167	158	158	14.46	6.56	R	3	0	1.77
275	t10	t10 10	C	188	188	200	202	0	0	162	162	195	195	177	177	158	206	13.89	5.83	R	3	0	2.14
276	t10	t10 11	C	168	168	200	202	149	149	162	162	195	195	177	177	158	206	15.23	6.18	R	2	0	1.77
277	t10	t10 12	C	0	0	200	202	149	149	162	162	195	195	167	177	158	158	15.15	7.06	R	2	0	1.73
278	t10	t10 13	C	0	0	200	202	149	149	162	162	195	195	179	179	158	158	15.19	7.1	R	4	0	1.36
279	t10	t10 14	C	158	158	200	202	145	145	162	162	195	195	177	177	158	206	15.81	6.56	R	4	0	2.14
280	t10	t10 15	C	158	158	200	202	0	0	162	162	0	0	159	195	158	158	17.19	5.14	J	5	2.8	1.3
281	t10	t10 16	C	0	0	200	202	0	0	162	162	0	0	175	177	158	206	17.49	4.18	R	2	0	1.21
282	t10	t10 17	C	0	0	200	202	0	0	162	162	195	195	175	177	158	158	18.15	4.18	R	3	0	1.93
283	t10	t10 18	C	0	0	200	202	151	151	162	162	0	0	175	177	158	158	18.45	4.76	J	10	0.7	1.68
284	t10	t10 19	C	0	0	200	202	151	151	162	162	0	0	167	167	158	158	19.3	4.6	R	2	0	1.74
285	t10	t10 20	C	0	0	200	202	149	149	162	162	195	195	177	177	158	158	20.75	3.72	J	11	5.5	2.75
286	t10	t10 21	C	176	178	200	202	151	151	162	162	195	195	177	195	158	206	20.87	4.41	R	4	0	1.92
287	t10	t10 22	C	168	168	200	202	149	149	162	162	195	195	177	177	158	206	19.18	6.37	R	3	0	2.31
288	t10	t10 23	C	178	178	200	202	149	149	162	162	195	195	175	177	158	158	20.06	6.56	R	2	0	1.17
289	t10	t10 24	C	158	158	200	202	149	171	162	162	195	195	177	177	158	158	19.18	7.52	J	9	1.2	2.5
290	t10	t10 25	C	158	158	200	202	149	149	162	162	195	195	167	167	158	158	21.06	7.17	J	10	0.5	2.3
291	t10	t10 26	C	158	158	200	202	149	149	162	162	0	0	177	177	158	158	23.4	5.64	J	13	0.7	2.3
292	t10	t10 27	C	158	158	200	202	147	149	162	162	0	0	177	177	158	158	21.33	10.28	J	6	3	2.57
293	t10	t10 28	C	0	0	200	202	147	149	162	162	0	0	173	173	158	158	18.91	9.21	R	2	0	2.04
294	t10	t10 29	C	158	158	200	202	147	147	162	162	195	195	167	177	158	158	17.07	10.7	R	3	0	1.23
295	t10	t10 30	C	158	158	200	202	147	147	162	162	0	0	177	177	158	206	18.95	10.4	R	4	0	1.5
296	t10	t10 31	C	0	0	200	202	147	147	172	172	0	0	175	177	158	158	17.11	10.74	R	2	0	2.06
297	t10	t10 32	C	146	146	200	200	147	147	166	166	0	0	175	187	158	208	15.5	10.13	R	2	0	2.31
298	t10	t10 33	C	146	146	0	0	0	0	0	0	0	0	175	177	158	158	14.46	9.48	J	7	2.3	1.8
299	t10	t10 34	C	0	0	200	202	147	173	162	162	0	0	175	177	158	158	13.73	9.97	R	1	0	0.5
300	t10	t10 35	C	0	0	200	202	147	147	162	162	0	0	167	167	158	158	12.08	10.32	R	2	0	1.81
301	t10	t10 36	C	158	158	202	204	147	167	166	172	0	0	175	177	158	158	10.51	10.09	J	7	1.1	2.33
302	t10	t10 37	C	184	184	200	202	147	167	162	162	0	0	179	179	158	158	7.6	2.99	R	3	0	1.97
303	t10	t10 38	C	144	144	202	202	147	167	162	162	0	0	167	177	158	158	7.44	3.41	R	1	0	1.46
304	t10	t10 39	C	180	180	200	202	147	147	162	162	0	0	177	177	158	158	8.52	11.59	R	4	0	2.14
305	t10	t10 40	C	0	0	200	202	147	173	162	164	0	0	177	197	158	158	9.48	12.2	R	2	0	1.46
306	t10	t10 41	C	0	0	200	202	147	167	164	164	0	0	177	177	158	158	10.51	11.28	J	7	1.9	1.96
307	t10	t10 42	C	0	0	200	202	147	167	164	166	0	0	175	177	158	158	11.62	11.2	R	2	0	1.36
308	t10	t10 43	C	0	0	202	204	147	171	162	162	0	0	165	167	158	158	11.62	12.47	R	3	0	1.53
309	t10	t10 44	C	0	0	200	202	147	167	162	162	0	0	177	177	158	158	13.66	11.89	R	1	0	2.5
310	t10	t10 45	C	0	0	200	202	147	167	162	162	195	195	177	177	158	158	14.54	11.62	R	3	0	1.46
311	t10	t10 46	C	0	0	200	202	147	147	162	162	0	0	167	167	158	158	14.04	12.31	R	2	0	1.36
312	t10	t10 47	C	0	0	200	202	147	147	162	162	195	195	177	177	158	158	14.04	12.28	R	2	0	1.53
313	t10	t10 48	C	0	0	200	202	147	147	156	162	167	167	177	177	158	158	14.31	14.27	R	1	0	1.15
314	t10	t10 49	C	0	0	200	202	147	147	156	162	195	195	177	177	158	158	16.84	14.31	R	1	0	1.36
315	t10	t10 50	C	0	0	200	202	147	173	162	162	195	195	177	177	158	158	16.73	14.65	R	2	0	2.56
316	t10	t10 51	C	166	166	200	202	147	147	162	162	195	195	177	177	158	158	15.92	15.96	R	2	0	1.4
317	t10	t10 52	C	170	170	200	202	147	147	162	162	195	195	177	177	158	158	7.25	14.96	R	2	0	1.46
318	t10	t10 53	C	170	170	200	202	147	167	162	162	0	0	177	177	158	158	9.32	16.65	R	2	0	1.53
319	t10	t10 54	C	170	170	200	202	147	167	162	162	0	0	177	177	158	158	7.1	16.57	R	1	0	1.17
320	t10	t10 55	C	170	170	198	206	147	147	162	162	0	0	177	177	158	158	9.32	16.65	R	1	0	1.93
321	t10	t10 56	C	186	170	200	202	147	167	162	162	0	0	175	175	158	158	10.01	16.69	R	2	0	1.55
322	t10	t10 57	C	168	168	200	202	147	167	162	162	195	195	175	177	0	0	11.89	15.38	R	2	0	1.97
323	t10	t10 58	C	170	170	200	202	147	167	162	162	0	0	171	175	158	158	11.39	15.35	R	1	0	0.86
324	t10	t10 59	C	170	170	200	202	147	167	162	162	0	0	167	167	158	158	13.16	16.23	R	3	0	1.92
325	t10	t10 60	C	170	170	200	202	147	167	162	162	0	0	175	175	158	158	12.51	17.03	R	3	0	1.83
326	t10	t10 61	C	0	0	200	202	147	167	162	162	0	0	183	189	158	158	12.47	15.84	R	3	0	1.92
327	t10	t10 62	C	170	170	200	202	147	167	162	162	0	0	175	177	158	158	13.63	17.38	J	4	1.1	2.79
328	t10	t10 63	C	170	170	200	200	147	173	162	162	0	0	177	177	158	158	15.77	16.92	R	1	0	1.72
329	t10	t10 64	C	170	170	200	202	147	167	162	162	0	0	175	175	158	158	18.49	15.04	R	1	0	2.71
330	t10	t10 65	C	0	0	200	202	147	167	162	162	0	0	177	177	204	206	20.75	14.42	R	1	0	1.12
331	t10	t10 66	C	154	154	200	202	147	167	162	162	0	0	177	177	158	158	22.94	16.88	R	3	0	4.99
332	t10	t10 67	C	182	182	200	202	147	167	162	162	0	0	177	177	158	158	17.19	19.8	R	4	0	5.38
333	t10	t10 68	C	0	0	200	202	147	147	170	170	0	0	175	175	158	158	19.22	16	J	10	2.9	4.43
334	t10	t10 69	C	166	166	200	202	147	167	162	162	0	0	175	185	158	158	20.83	18.87	R	10	0	1.96
335	t10	t10 70	C	188	188	200	202	147	167	162	162	0	0	167	167	158	158	18.41	18.8	R	2	0	1.36
336	t10	t10 71	C	0	0	200	202	147	167	162	162	0	0	179	179	158	158	16.73	17.46	R	3	0	1.92
337	t10	t10 72	C	0	0	200	202	147	167	162	162	203	203	177	177	158	158	16.19	18.41	R	3	0	1.77
338	t10	t10 73	C	0	0	200	202	147	167	162	162	0	0	189	189	158	158	13.96	18.76	J	5	2.2	1.55
339	t10	t10 74	C	168	168	200	202	147	167	170	170	0	0	189	189	158	158	13.39	20.26	R	4	0	2.69
340	t10	t10 75	C	0	0	200	202	147	167	170	170	0	0	177	189	158	158	10.09	18.84	R	5	0	2.5
341	t10	t10 76	C	0	0	202	204	147	173	168	168	0	0	177	189	158	158	9.02	18.57	R	2	0	1.49
342	t10	t10 77	C	0	0	200	202	147	167	162	162	0	0	189	189	158	158	8.02	19.18	R	1	0	1.49
343	t10	t10 78	C	160	160	200	202	147	167	162	162	0	0	177	177	158	158	22.58	3.5	R	7	0	2.54
344	t10	t10 79	C	0	0	200	202	147	167	162	162	0	0	183	189	158	158	25.07	1.75	J	7	1.2	2.42
345	t10	t10 80	C	146	146	200	202	147	167	162	162	0	0	179	179	158	158	23.57	2.15	R	6	0	2.34
346	t10	t10 81	C	178	178	200	202	147	167	162	162	0	0	177	177	158	158	15.65	20.35	R	2	0	1.37
347	t10	t10 82	C	170	170	200	202	147	167	162	162	0	0	177	177	158	158	19.21	11.36	R	3	0	2.29
348	t10	t10 83	C	170	170	200	202	147	167	162	162	0	0	181	181	158	158	7.58	5.61	R	2	0	1.28
349	t10	t10 84	C	178	178	200	202	147	179	162	162	195	195	0	0	158	158	9.36	7.52	R	2	0	1.17
350	t10	t10 85	C	170	170	200	202	147	167	162	162	0	0	177	177	158	158	8.59	9.45	R	1	0	1.24
351	t10	t10 86	C	170	170	200	202	147	167	162	162	0	0	175	175	158	158	8.44	17.7	R	2	0	1.52
352	t10	t10 87	C	170	170	200	200	147	167	162	162	0	0	175	175	158	158	26.08	17.58	R	7	0	2.36
353	t10	t10 88	C	0	0	200	202	147	173	162	162	195	195	185	189	0	0	20.43	11.44	R	1	0	0.82
354	t10	t10 89	C	164	164	200	202	147	173	162	162	0	0	189	189	158	158	6.72	6.2	R	1	0	1.37
355	t11	t11 1	W	166	166	202	204	173	173	162	162	195	195	189	189	158	158	15.49	5.65	R	1	0	1.22
356	t11	t11 2	W	162	166	202	204	173	173	162	162	195	195	177	177	158	158	21.54	6.87	R	3	0	1.64
357	t11	t11 3	W	168	168	202	204	147	147	164	170	0	0	183	189	158	158	26.34	4.55	R	2	0	1.83
358	t11	t11 4	W	166	166	202	204	147	147	164	164	195	195	177	177	158	158	25.81	7.8	R	2	0	2.04
359	t11	t11 5	W	176	176	202	202	147	147	162	162	0	0	195	195	158	158	25.2	9.84	R	1	0	1.48
360	t11	t11 6	W	166	166	200	202	147	167	162	162	0	0	189	189	158	158	23.78	12.19	R	2	0	1.42
361	t11	t11 7	W	0	0	200	200	147	147	162	162	195	195	177	177	158	158	23.37	14.35	R	3	0	1.42
362	t11	t11 8	W	0	0	200	200	147	147	162	162	181	181	177	177	158	158	21.91	13.74	R	2	0	1.02
363	t11	t11 9	W	162	162	198	200	147	147	162	164	181	181	177	177	158	158	24.02	15.89	R	1	0	0.91
364	t11	t11 10	W	158	158	200	202	147	147	162	166	195	195	177	177	158	158	15.85	10.04	R	1	0	1.22
365	t11	t11 11	W	158	158	200	200	147	147	162	162	0	0	177	177	158	158	14.59	13.54	R	2	0	1.87
366	t11	t11 12	W	0	0	200	200	147	147	162	162	0	0	177	177	158	158	15.93	10.08	R	1	0	1.02
367	t11	t11 13	W	0	0	200	202	0	0	166	166	175	175	177	177	158	158	12.03	9.47	R	1	0	1.19
368	t11	t11 14	W	0	0	200	202	147	167	162	162	0	0	177	177	158	158	17.72	18.82	R	1	0	1.74
369	t12	t12 1	W	0	0	0	0	0	0	0	0	0	0	0	0	0	0	12.19	5.01	R	1	0	1.19
370	t12	t12 2	W	0	0	0	0	0	0	0	0	0	0	0	0	0	0	15.22	6.14	R	1	0	0.81
371	t12	t12 3	W	0	0	0	0	0	0	0	0	0	0	0	0	0	0	21.88	12.45	R	1	0	0.64
372	t12	t12 4	W	0	0	0	0	0	0	0	0	0	0	0	0	0	0	27.12	15.51	R	1	0	0.83
